# Supplementary material for: Prodomain–growth factor swapping in the structure of pro-TGF-β1
Source: PubMed Central journal article supplement (PMC5798290; doi:10.1074/jbc.m117.809657), 2017-11-05
Supplement: 10.1074_M117.809657_jbc.M117.809657-1.pdf [file 10.1074_M117.809657_jbc.M117.809657-1.pdf]

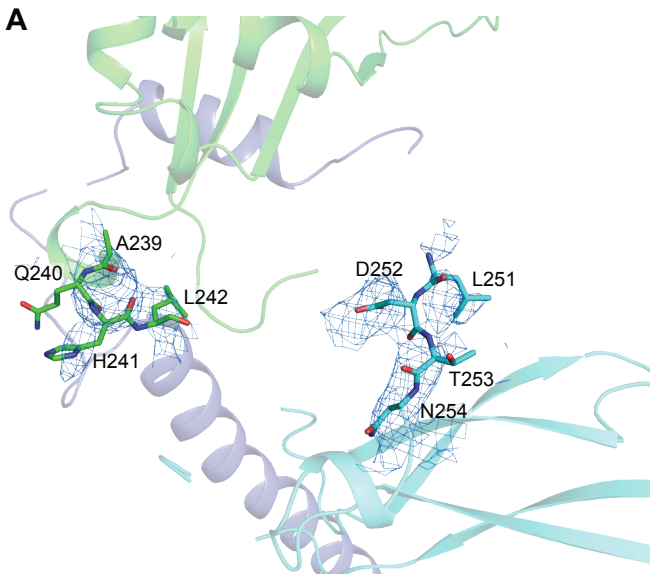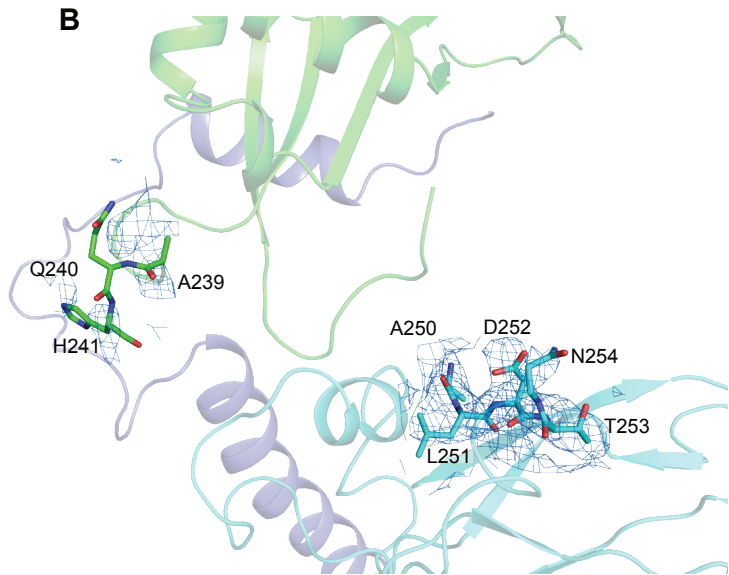

**Figure S1. Omit map showing the electron density of the connectivity region.** Simulated annealing composite omit 2Fo-Fc maps were calculated using Phenix. Electron density contoured at 1  $\sigma$  is shown as blue mesh for the connectivity region between the prodomain arm domain and the growth-factor in the crystal structures of the uncleaved R249A PC mutant pro-TGF- $\beta$ 1 (A) and the cleaved WT pro-TGF- $\beta$ 1 (B). The arm domain is green, the straitjacket is lightblue, and the growth factor is cyan. Residues 239-242 of the prodomain and 251-254 for the growth-factor are shown as sticks.
